# Supplementary material
Source: PubMed Central journal article supplement (PMC4496154)

## Supporting Information

**Suppl Fig. 1. MARCH1 regulates CD86 expression in various hematopoietic cell types.** Splens and lymph nodes of wild type mice (solid gray) and MARCH1<sup>-/-</sup> mice (line) were processed to single cell suspensions, and subsequently analyzed by flow cytometry. Various cell types were gated by their expression of specific markers (see method), and CD86 expression in each cell type was determined.

**Suppl Fig. 2. Expression of ubiquitination-resistant CD86 mutant did not alter MHCI expression.** Flow cytometry analysis of CD86<sup>-/-</sup> BMDCs expressing wild type CD86 (WT) and CD86 (K>R) mutant.

**Suppl Fig. 3. Regulation of T cell activation by activated DCs was dependent on CD86 ubiquitination.** BMDCs expressing wild type CD86 and CD86 (K>R) were treated as described in Figure 9B. IL-2 concentrations are depicted relative to the level of IL-2 secreted by T cells that had been mixed with LPS-treated DCs expressing wild type CD86. Data represent the mean  $\pm$  s.e.m. of three independent experiments.

**Fig. S1**

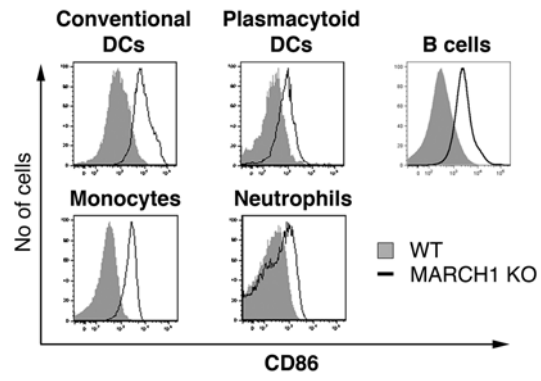

**Fig. S2**

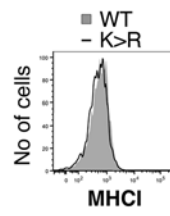

**Fig. S3**

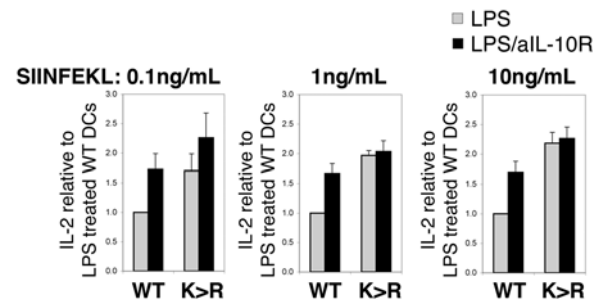

Supplement: NIHMS703026-supplement-suppl.pdf [file NIHMS703026-supplement-suppl.pdf]
